# Supplementary material for: PFOS Inhibited Normal Functional Development of Placenta Cells via PPARγ Signaling
Source: MDPI journal article supplement (doi:10.3390/biomedicines9060677), 2021-06-15
Supplement: s1 [file s1]

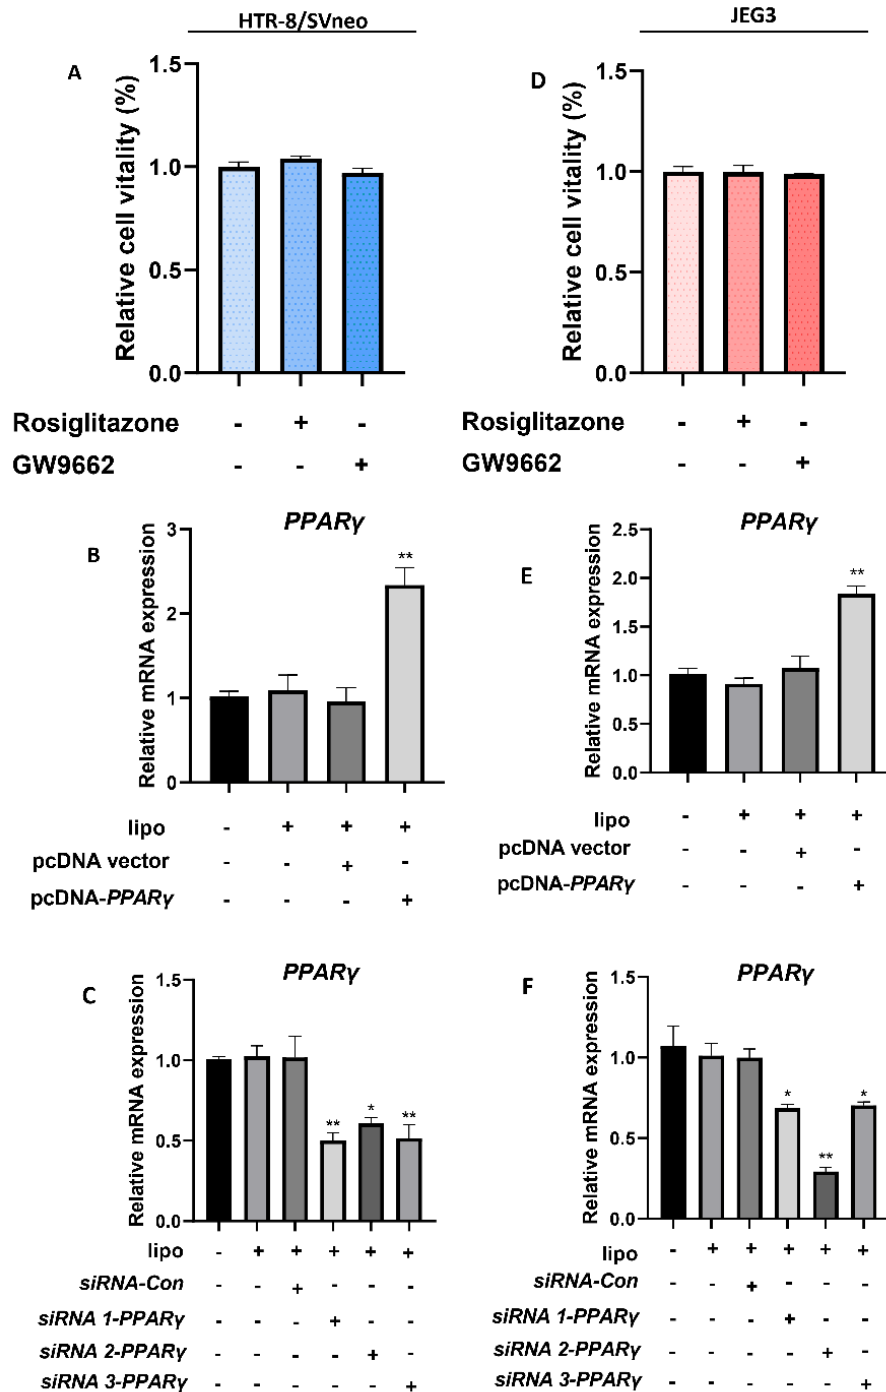

**Figure S1.** Effect of rosiglitazone and GW9662 on proliferation in human HTR-8/SVneo and JEG-3 cells. Cell growth was detected by CCK-8 assay in HTR-8/SVneo and JEG-3 cells treated with rosiglitazone and GW9662 for 24 h (A and B). Relative mRNA expression levels of *PPARγ* were validated by RT-PCR after the cells were *PPARγ* overexpressed (C and D) and knocked down (E and F). The data are shown as the means  $\pm$  S.E.M. \* $P < 0.05$ ; \*\* $P < 0.01$ . n = 3.

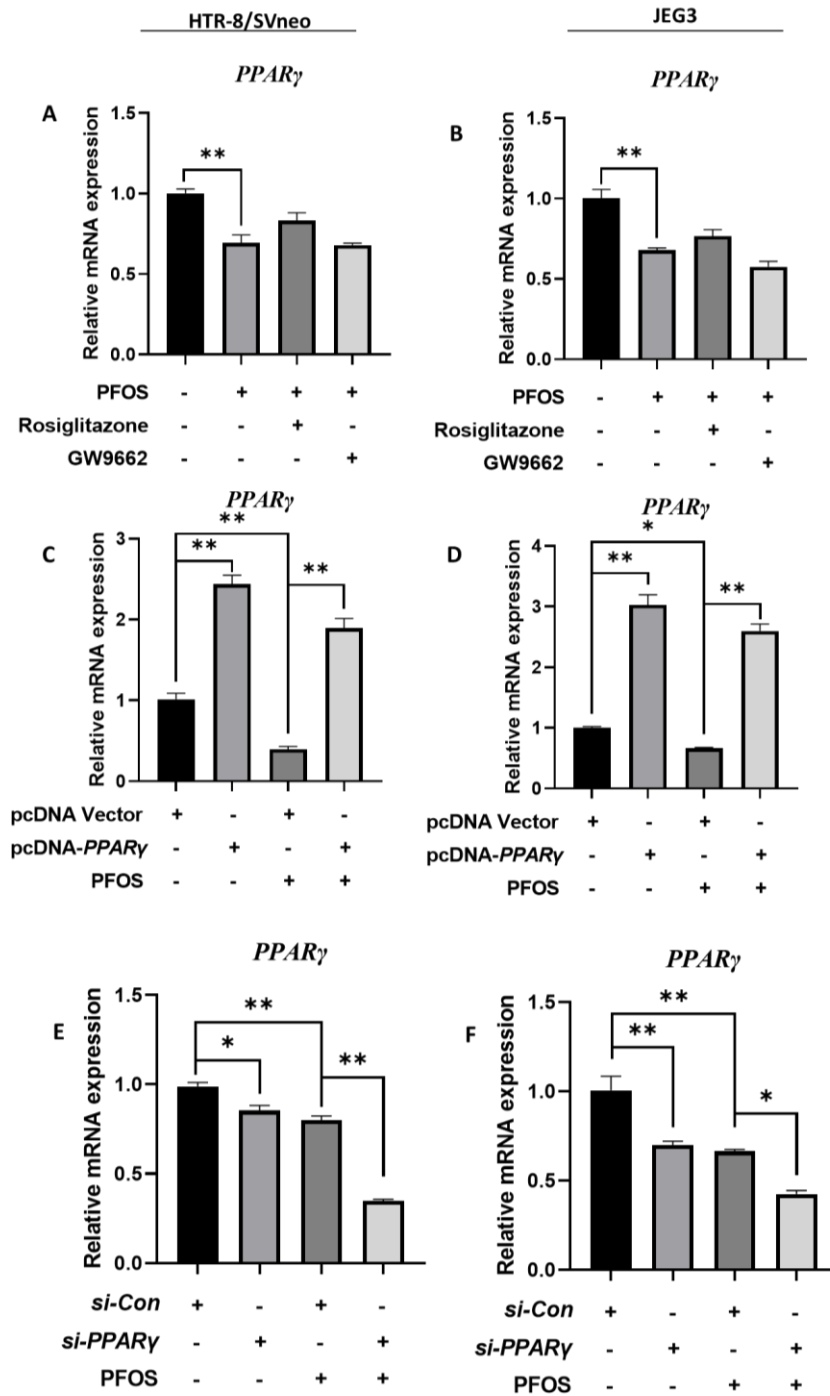

**Figure S2.** Effect of PFOS on PPAR mRNA expression in human HTR-8/SVneo and JEG-3 cells. Relative mRNA expression levels of *PPARγ* were validated by RT-PCR after HTR-8/SVneo and JEG-3 cells treated with rosiglitazone and GW9662 for 24 h (A and B). Relative mRNA expression levels of *PPARγ* were validated by RT-PCR after the cells were *PPARγ* overexpressed (C and D) and knocked down (E and F). The data are shown as the means  $\pm$  S.E.M. \* $P < 0.05$ ; \*\* $P < 0.01$ . n = 3.

**Table S1. RT-PCR primers for analysis**

| Gene symbol                     | Forward primer (5' -> 3') | Reverse primer (5' -> 3') |
|---------------------------------|---------------------------|---------------------------|
| <i>hGAPDH</i>                   | GGAAATCCCATCACCATCT       | GGACTCCACGACGTACTCA       |
| <i>hANGPTL4</i>                 | CTCAAGGCTCAGAACAGCAGG     | TGGTCCAGGAGGCCAAACT       |
| <i>hHMOX1</i>                   | CAGCGGGCCAGCAACAAAG       | ACCCATCGGAGAAGCGGAGC      |
| <i>hVEGFA</i>                   | AGGGCAGAATCATCACGAAG      | GAAGATGTCCACCAGGGTCTC     |
| <i>hMMP-2</i>                   | CTTCCAGGGCACATCCTAT       | CCTTCTGAGTTCCCAACAA       |
| <i>hMMP-9</i>                   | TCCCTGGAGACCTGAGAACC      | GCCACCCGAGTGTAACCAT       |
| <i>hp65</i>                     | GGGGACTACGACCTGAATGCT     | GTCAAAGATGGGATGAGAAAGGA   |
| <i>hTNF-<math>\alpha</math></i> | TGAAAGCATGATCCGGGACG      | AGGCAGAAGAGCGTGGTGGC      |
| <i>hIL-6</i>                    | CAAATTCGGTACATCCTCG       | TTTCTGCCAGTGCCTCTTT       |
| <i>hIL-1<math>\beta</math></i>  | ATGGCTTATTACAGTGGCA       | GTAGTGGTGGTCGGAGATT       |
| <i>mGapdh</i>                   | TCTTGGGCTACACTGAGGA       | ATACCAGGAAATGAGCTTGA      |
| <i>mAngptl4</i>                 | ATCACAGGGAACCGAGGAA       | ATTGGAGCAATTTGGCATT       |
| <i>mHmox1</i>                   | GGTGATGGCTTCCTTGTA        | AGACTGGGTTCTGCTTGTT       |
| <i>mVegfa</i>                   | GCACCCACGACAGAAGGAG       | TCAATCGGACGGCAGTAGC       |
| <i>mMmp-2</i>                   | TGTCCCGAGACCGCTATGT       | TTGCCCAGGAAAGTGAAGG       |
| <i>mMmp-9</i>                   | ACAGCCAACTATGACCAGGAT     | TTGCCCAGGAAGACGAAGG       |
| <i>mp65</i>                     | TGCGATTCCGCTATAAATG       | TTGGTGGTATCTGTGCTTCTC     |
| <i>mTnf-<math>\alpha</math></i> | TCTCATTCCTGCTTGTTGGC      | GGAAGTTCTCATCCCTTTGG      |
| <i>mIl-6</i>                    | CTTCTTGGGACTGATGCTG       | GGTCTGTTGGGAGTGGTAT       |
| <i>mIl-1<math>\beta</math></i>  | TGAAGGGCTGCTTCCAAAC       | GATGTGCTGCTGCGAGATT       |
